# Supplementary material
Source: Springer Nature journal article supplement (https://www.springermedizin.de/resource/supplementary/12903_2010_164_MOESM1_ESM.pdf/9516252)
Supplement: MOESM1 [file 9516252]

**Individual level**

**Contextual level**

**Human development index**

**First block**

**Demographic characteristics  
sex, age and ethnic group**

**Second block**

**Socioeconomic status  
income, education and type of school**

**Third block**

**Oral status  
untreated dental caries and endodontic treatment need**
